# Supplementary material
Source: publisher figshare collection journal article supplement (https://tandf.figshare.com/articles/dataset/_/5244676)
Supplement: Supplementary file 3 [file 2]

Archive with 3 entries (3 files):
- Ciecka Skoog Appendix.pdf
- Ciecka Skoog Supplementary Material pdf File.pdf
- SPP Supplementary Material Revision.docx
